# Supplementary material for: Seagrass community-level controls over organic carbon storage are constrained by geophysical attributes within meadows of Zanzibar, Tanzania
Source: Copernicus journal article supplement (doi:10.5194/bg-2017-474), 2017-12-18
Supplement: Supplementary file [file bg-2017-474-AC1-supplement.zip]

**Table 1. Landscape sediment characterization of the four biogeographic zones. Summary statistics (mean, standard deviation, Skewness, Kurtosis) are based on the logarithmic Folk and Ward method are shown in both  $\mu\text{m}$  and  $\phi$  scale. The distribution spread (D10-D90) of grain sizes is calculated as the difference between the grain size (D10) where 10% of grains are coarser and the grain size (D90) where 90% of the grains are coarser. D50 is the median grain size.**

| Zone                              | Reef Flat     | Fore Reef     | Tidal Channel | Seagrass      |
|-----------------------------------|---------------|---------------|---------------|---------------|
| N                                 | 7             | 10            | 4             | 8             |
| Mean grain size ( $\mu\text{m}$ ) | 2819          | 2352          | 2546          | 1953          |
| SD grain size ( $\mu\text{m}$ )   | 2.15          | 2.19          | 2.54          | 2.39          |
| Mean grain size ( $\phi$ )        | 0.54          | 0.63          | 0.43          | 0.66          |
| SD grain size ( $\phi$ )          | 1.11          | 1.13          | 1.35          | 1.25          |
| Skewness                          | -0.379        | -0.295        | -0.107        | -0.052        |
| Kurtosis                          | 1.137         | 1.025         | 0.987         | 0.965         |
| Sorting                           | Poorly Sorted | Poorly Sorted | Poorly Sorted | Poorly Sorted |
| Texture                           | Gravelly Sand | Gravelly Sand | Gravelly Sand | Gravelly Sand |
| % Gravel                          | 15.4          | 13.6          | 16.8          | 14.8          |
| % Sand                            | 84.1          | 85.6          | 82.1          | 84.4          |
| % Mud ( $>63 \mu\text{m}$ )       | 0.5           | 0.8           | 1.1           | 0.7           |
| D10 ( $\mu\text{m}$ )             | 2164          | 2123          | 2189          | 2130          |
| D50 ( $\mu\text{m}$ )             | 865           | 779           | 750           | 641           |
| D90 ( $\mu\text{m}$ )             | 227           | 212           | 194           | 192           |
| D10-D90 ( $\mu\text{m}$ )         | 1937          | 1911          | 1995          | 1938          |
